# Supplementary material for: Migraine Surgery
Source: PubMed Central journal article supplement — Plast Reconstr Surg Glob Open. 2019 Jul 31;7(7):e2291. doi: 10.1097/GOX.0000000000002291 (PMC6952133; doi:10.1097/gox.0000000000002291), 2019-07-31
Supplement: gox-7-e2291-s005.pdf [file gox-7-e2291-s005.pdf]

## Migraine Surgery Intake Questionnaire

Name:

Date:

Telephone (Home):

Telephone (Work):

Date of Birth:

Female  Male

Health Insurance Company:

PCP:

Neurologist:

1. How many **migraine** headaches do you experience per month?
2. How many **regular** headaches do you experience per month?
3. How long do your migraine headaches usually last (in hours) ?
4. How painful are your headaches **on average**? (circle one number)

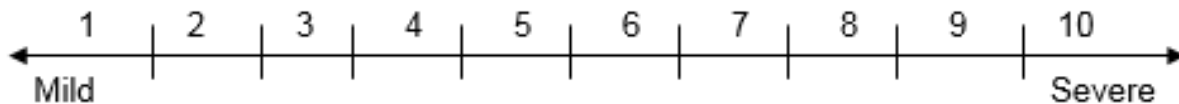

5. What is the **worst** headache that you experience regularly? (circle one number)

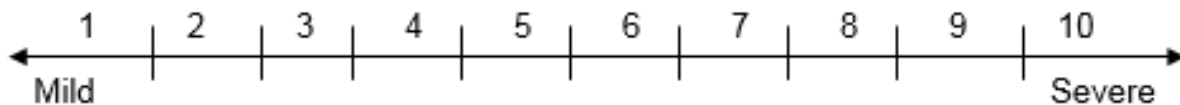

6. What is the **mildest** headache that you experience regularly? (circle one number)

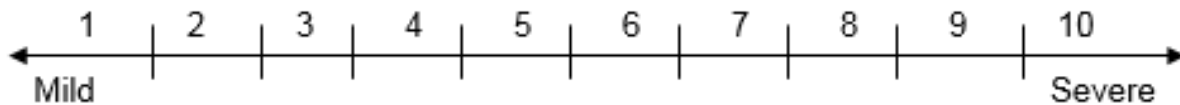

7. What is your headache score **today**? (circle one number)

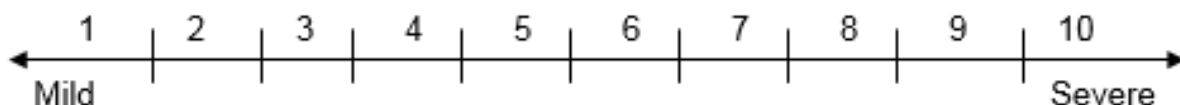

8. Does your headache score actually ever go to zero?  YES  NO

9. On which side of the head is your pain?

right side  left side  both sides

10. Is your pain more prominent on the right side, the left side, or equal on both sides?

right side  left side  both sides

11. Where do your migraine headaches usually **START**? (check all that apply)

- Behind right eye
- Right temple
- Above right eyebrow
- Back of head on right
- Nose / center of face
- Behind left eye
- Left temple
- Above left eyebrow
- Back of head on left
- Other: Please describe \_\_\_\_\_
- Behind both eyes
- Both temples
- Above both eyebrows
- Back of head on both sides

12. Please draw where the pain starts and where it spreads. Use X for where it starts or is more severe, and arrows for where it spreads.

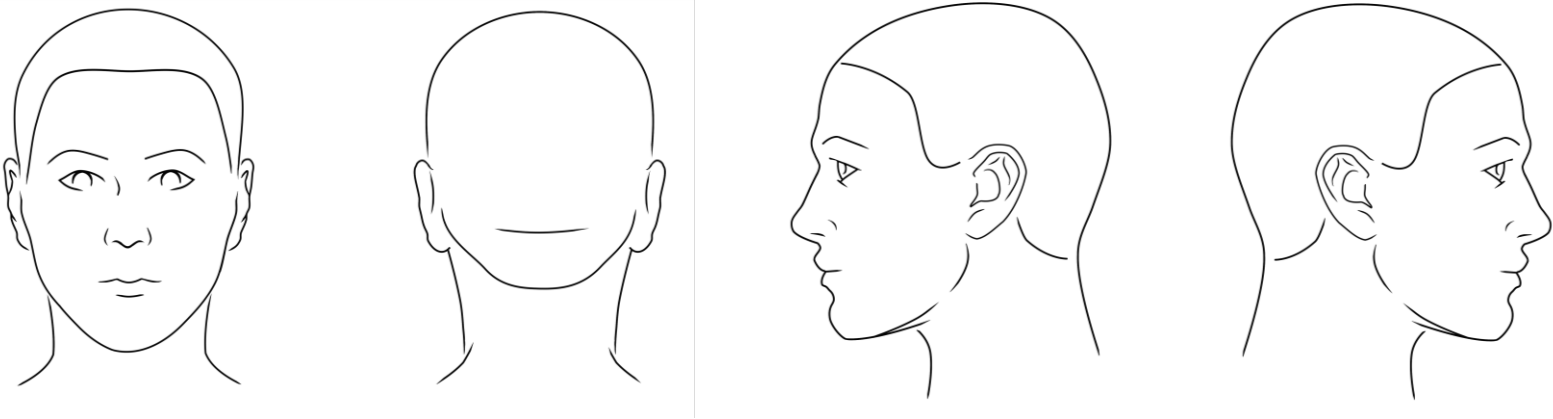

13. How old were you when your **migraine** headaches started? \_\_\_\_\_

14. Was there any event that you believe caused/started your migraines?

- YES
- NO

If yes, what event? \_\_\_\_\_

15. Have you ever had a **head or neck injury** (e.g. whiplash, concussion)?  YES  NO

a. If yes, please describe: \_\_\_\_\_  
 \_\_\_\_\_

16. Do you or one of your physicians suspect that a health disorder is somehow related to your migraine headaches?

- YES
- NO

a. If yes, please describe: \_\_\_\_\_  
 \_\_\_\_\_

17. How would you describe the pain associated with your migraine headaches? (check all that apply)

- Throbbing or pounding
- Aching or pressure
- Tightness
- Dull pain

Other: \_\_\_\_\_

18. Do your migraine headaches wake you up at night?

Never

Occasionally

Often

19. Do any of the following occur before or during your migraine headaches? (check all that apply)

Nausea

Vomiting

Diarrhea

Bothered by light/noise

Blurred/double vision

Sparkling, flashing, or colored lights

Eyelid puffy

Eyelid drooping

Loss of vision

Lightheadedness

Numbness / tingling

Weakness of arm or leg

Difficulty concentrating

Speech difficulty

Loss of consciousness

Runny nose

Other: \_\_\_\_\_

20. Do any of the following trigger your migraine headaches or make them worse? (check all that apply)

Stress (worry, anger)

Bright sunshine

Weather change

Letdown after stress

Loud noise

Heavy lifting

Air travel

Fatigue

Certain smells or perfume

Missed meals

Sexual activity

Coughing, straining, bending over

Certain foods (chocolate, cheese, beer, MSG)

Other: \_\_\_\_\_

21. Do any of the following make your migraine headaches better?

Rest

Exercise

Quiet and darkness

Hot or cold compress

Massage

Warm shower

Pressure over migraine headache area

Other: \_\_\_\_\_

22. If you are female, do your migraine headaches change with the following? (check all that apply)

Menstrual periods

Birth control pills

Pregnancy

Other hormonal drugs

If yes, have the conditions mentioned above made your migraines better or worse?

Better

Worse

23. a. How many neurologists have you seen for your migraines? \_\_\_\_\_

Please list their names:

---

---

---

b. What was the diagnosis? (check all that apply)

- Migraine    Tension-Headache    Cluster     Occipital Neuralgia    Trigeminal Neuralgia      
Chronic Migraine     Episodic Migraine    Cervicogenic Headache  
Other: \_\_\_\_\_

24. Have you had any of the following **radiology studies** performed?

- a. MRI (Head):                       YES                       NO  
    i. If yes, date of study: \_\_\_\_\_
- b. MRI (Neck):                       YES                       NO  
    i. If yes, date of study: \_\_\_\_\_
- c. CT Scan (Head/Neck):         YES                       NO  
    i. If yes, date of study: \_\_\_\_\_
- d. Other  YES                       NO  
    i. If yes, type and date of study: \_\_\_\_\_

\*\*\*If you answered yes to any of the radiology studies, please bring copy of reports to your appointment\*\*\*

25. Please list **current** medications you are taking to treat your migraine headaches:

- a. Preventative (Prophylactic):
- 
- 
- 
- 
- 
- 
- 
- 
- 
- 
- b. Rescue (Abortive):

26. Please check any **past medications** you have taken to treat your migraine headaches:

- a. Anti-inflammatory:
- Aspirin                       Advil                       Toradol                       Tylenol  
 Excedrin                       Aleve                       Cortisol                       Prednisone  
 Dexamethasone     Other: \_\_\_\_\_
- b. Narcotics:
- Fiorinal                       Vicodin                       Percocet                       Demerol  
 Oxycontin                       Oxycodone                       Hydrocodone                       Fioricet  
 Other: \_\_\_\_\_
- c. Abortive:
- Cafegot                       Relpax                       Treximet                       Maxalt

- |                                      |                                  |                                       |                                 |
|--------------------------------------|----------------------------------|---------------------------------------|---------------------------------|
| <input type="checkbox"/> Amerge      | <input type="checkbox"/> Frova   | <input type="checkbox"/> Zomig        | <input type="checkbox"/> Midrin |
| <input type="checkbox"/> Sumatriptan | <input type="checkbox"/> Imitrex | <input type="checkbox"/> Other: _____ |                                 |

d. Preventative:

- |                                        |                                       |                                        |                                        |
|----------------------------------------|---------------------------------------|----------------------------------------|----------------------------------------|
| <input type="checkbox"/> Propranolol   | <input type="checkbox"/> Timolol      | <input type="checkbox"/> Nadolol       | <input type="checkbox"/> Metoprolol    |
| <input type="checkbox"/> Atenolol      | <input type="checkbox"/> Verapamil    | <input type="checkbox"/> Diltiazem     | <input type="checkbox"/> Amitriptyline |
| <input type="checkbox"/> Nortriptyline | <input type="checkbox"/> Topiramate   | <input type="checkbox"/> Elavil        | <input type="checkbox"/> Topamax       |
| <input type="checkbox"/> Clonidine     | <input type="checkbox"/> Feverfew     | <input type="checkbox"/> Dilantin      | <input type="checkbox"/> Depakote      |
| <input type="checkbox"/> Zoloft        | <input type="checkbox"/> Paxil        | <input type="checkbox"/> Prozac        | <input type="checkbox"/> Effexor       |
| <input type="checkbox"/> Wellbutrin    | <input type="checkbox"/> Trazodone    | <input type="checkbox"/> Protriptyline | <input type="checkbox"/> Desipramine   |
| <input type="checkbox"/> Doxepin       | <input type="checkbox"/> Other: _____ |                                        |                                        |

e. Miscellaneous:

- |                                    |                                       |                                   |                                     |
|------------------------------------|---------------------------------------|-----------------------------------|-------------------------------------|
| <input type="checkbox"/> Phrenilin | <input type="checkbox"/> DHE          | <input type="checkbox"/> Baclofen | <input type="checkbox"/> Gabapentin |
| <input type="checkbox"/> Cymbalta  | <input type="checkbox"/> Other: _____ |                                   |                                     |

27. Please list any **over-the-counter (OTC)** medications related to migraine that you are currently taking:

---



---



---



---

28. Have you ever had **Botox** to treat your migraines?  YES  NO

a. Where?  Back of head (occipital region)  Front of head (forehead/brow)  Both

b. Who performed your Botox injections? \_\_\_\_\_

c. Did your Botox injections help?

- no relief (0%)  
 some relief (<50%)  
 significant relief (>50%, but not complete)  
 complete relief (100%)

29. Have you ever had **nerve blocks** to treat your migraines?  YES  NO

a. Where?  Back of head (occipital region)  Front of head (forehead/brow)  Both

b. Who performed your nerve blocks? \_\_\_\_\_

c. Did your nerve blocks help at the time of the injection (while there was numbness)?

- no relief (0%)  
 some relief (<50%)  
 significant relief (>50%, but not complete)  
 complete relief (100%)

30. Have you ever had a **nerve stimulator** to treat your migraines?  YES  NO
- a. Where?  Back of head (occipital region)  Front of head (forehead/brow)  Both
  - b. Who performed your nerve stimulator?
  - c. Which nerve stimulator was implanted?
  - d. Did your nerve stimulator help?
    - no relief (0%)
    - some relief (<50%)
    - significant relief (>50%, but not complete)
    - complete relief (100%)
  - e. For how many months did the nerve stimulator help?

31. Have you ever had **radiofrequency nerve ablation** to treat your migraines? YES NO
- a. Where?  Back of head (occipital region)  Front of head (forehead/brow)  Both
  - b. Who performed your nerve ablation? \_\_\_\_\_
  - c. Did your nerve ablation help?
    - no relief (0%)
    - some relief (<50%)
    - significant relief (>50%, but not complete)
    - complete relief (100%)
  - d. For how many months did the nerve ablation help?

32. Have you sought treatment in the emergency room or hospital for your migraine headaches?  
 No  Yes – If yes, how many times? \_\_\_\_\_

33. Please list any other treatment(s) you have received for your migraine headaches:
- acupuncture
  - massage
  - craniosacral therapy
  - other: \_\_\_\_\_

34. How much would you estimate your migraine headache medications, appointments, and treatments

35. cost you **per month**? \_\_\_\_\_

36. How many of these medical expenses would you estimate are covered by your health insurance

37. **per month**? \_\_\_\_\_

38. To what extent do your migraine headaches affect your overall quality of life? (check one)

- Completely (unable to do desired activities)
- Moderately
- Minimally
- Not at all (able to do desired activities)

39. Do you have/had any of the following **medical conditions**? (check all that apply)

- |                                        |                                       |                                                |
|----------------------------------------|---------------------------------------|------------------------------------------------|
| <input type="checkbox"/> Diabetes      | <input type="checkbox"/> Heart attack | <input type="checkbox"/> Stroke                |
| <input type="checkbox"/> Epilepsy      | <input type="checkbox"/> Hypertension | <input type="checkbox"/> Hypotension           |
| <input type="checkbox"/> Depression    | <input type="checkbox"/> Fibromyalgia | <input type="checkbox"/> Thyroid disorder      |
| <input type="checkbox"/> Asthma        | <input type="checkbox"/> Lupus        | <input type="checkbox"/> Peripheral neuropathy |
| <input type="checkbox"/> Carpal tunnel | <input type="checkbox"/> Shingles     | <input type="checkbox"/> Cold sores/herpes     |
| <input type="checkbox"/> Other: _____  |                                       |                                                |

40. Please list any previous surgeries you have had and when they took place:

---

---

---

---

41. What is your approximate consumption of the following:

- a. Coffee/Tea/Caffeinated Soda: \_\_\_\_\_ per day / week / month
- b. Alcohol: \_\_\_\_\_ per day / week / month
- c. Tobacco: \_\_\_\_\_ per day / week / month
- d. Other intoxicating/mind altering drugs: \_\_\_\_\_ per day / week / month

42. Please list any **medication allergies** you have:

---

---

43. Do any of your family members have migraine headaches?

- No  Yes – If yes, who? \_\_\_\_\_

44. Please list any additional information that you feel is important to your medical care/history:

---

---
