# Supplementary figures and images for: Migraine Surgery
Source: PubMed Central journal article supplement — Plast Reconstr Surg Glob Open. 2019 Jul 31;7(7):e2291. doi: 10.1097/GOX.0000000000002291 (PMC6952133; doi:10.1097/gox.0000000000002291), 2019-07-31

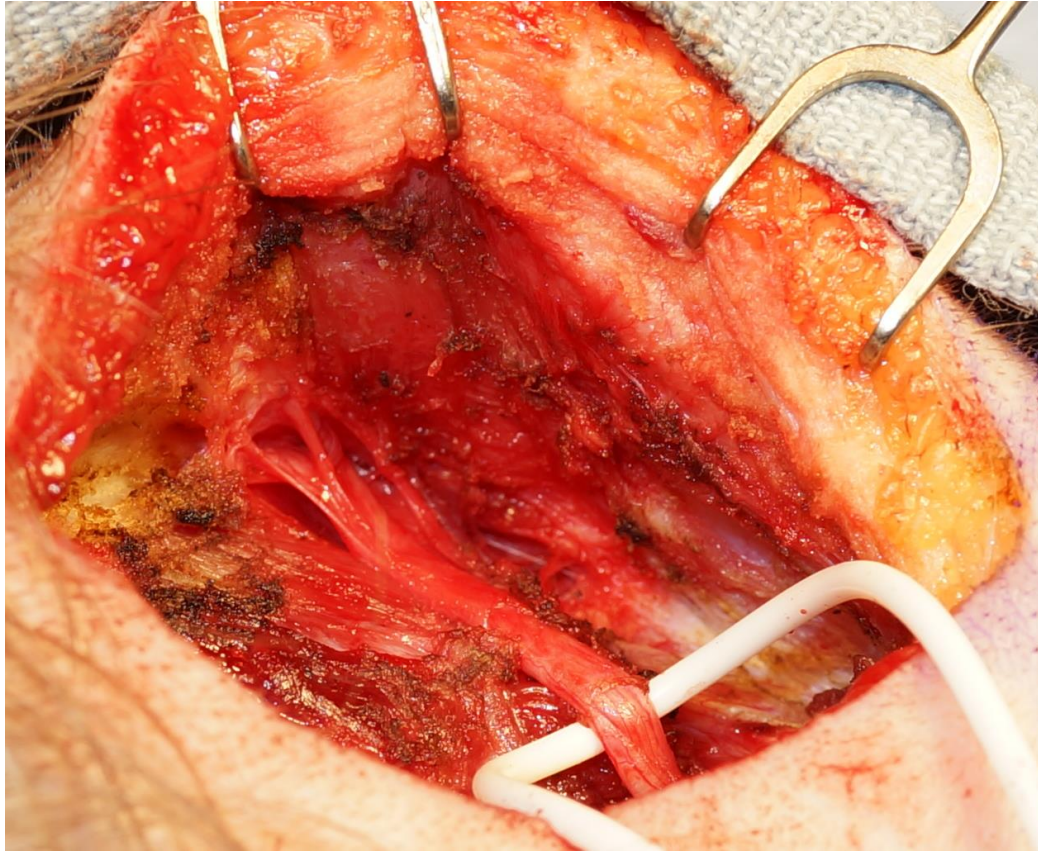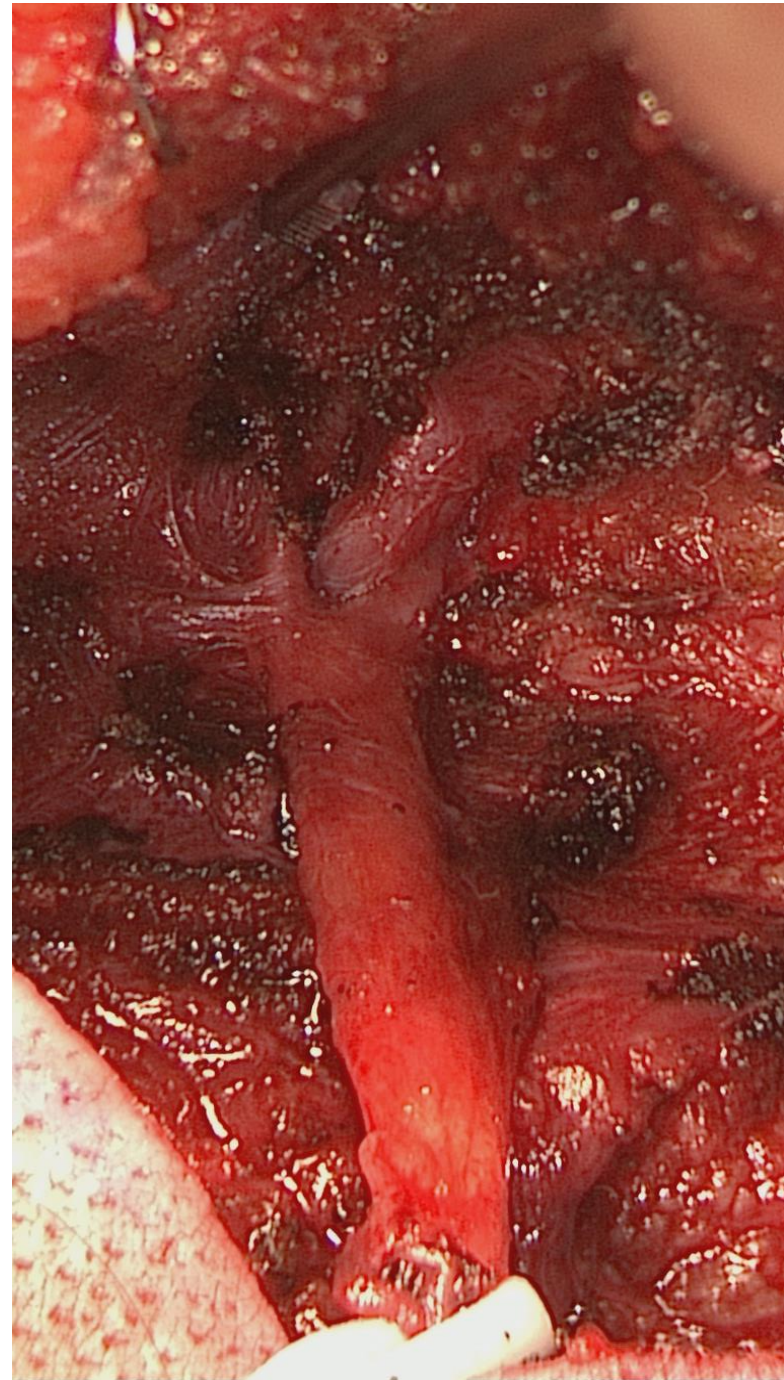

Supplement: gox-7-e2291-s006.pdf [file gox-7-e2291-s006.pdf]

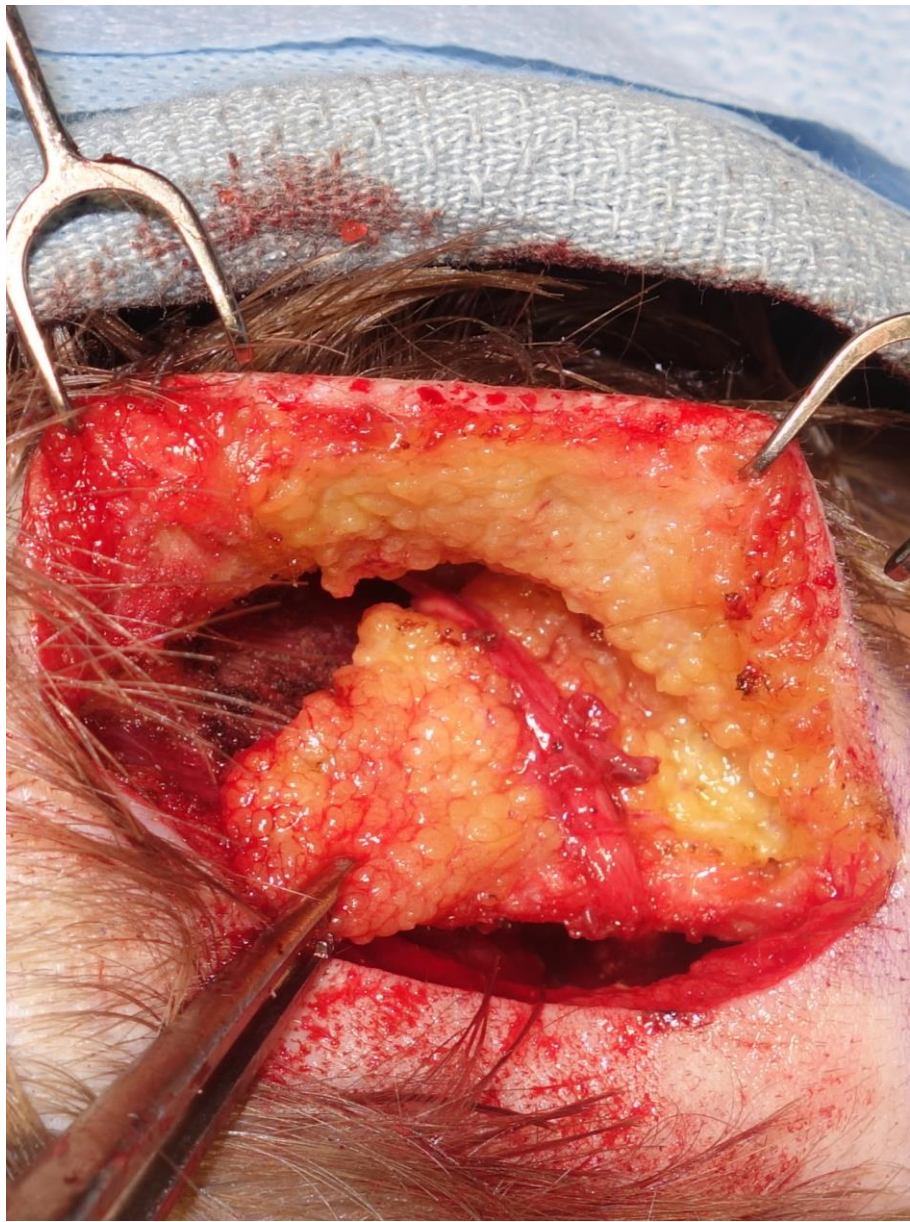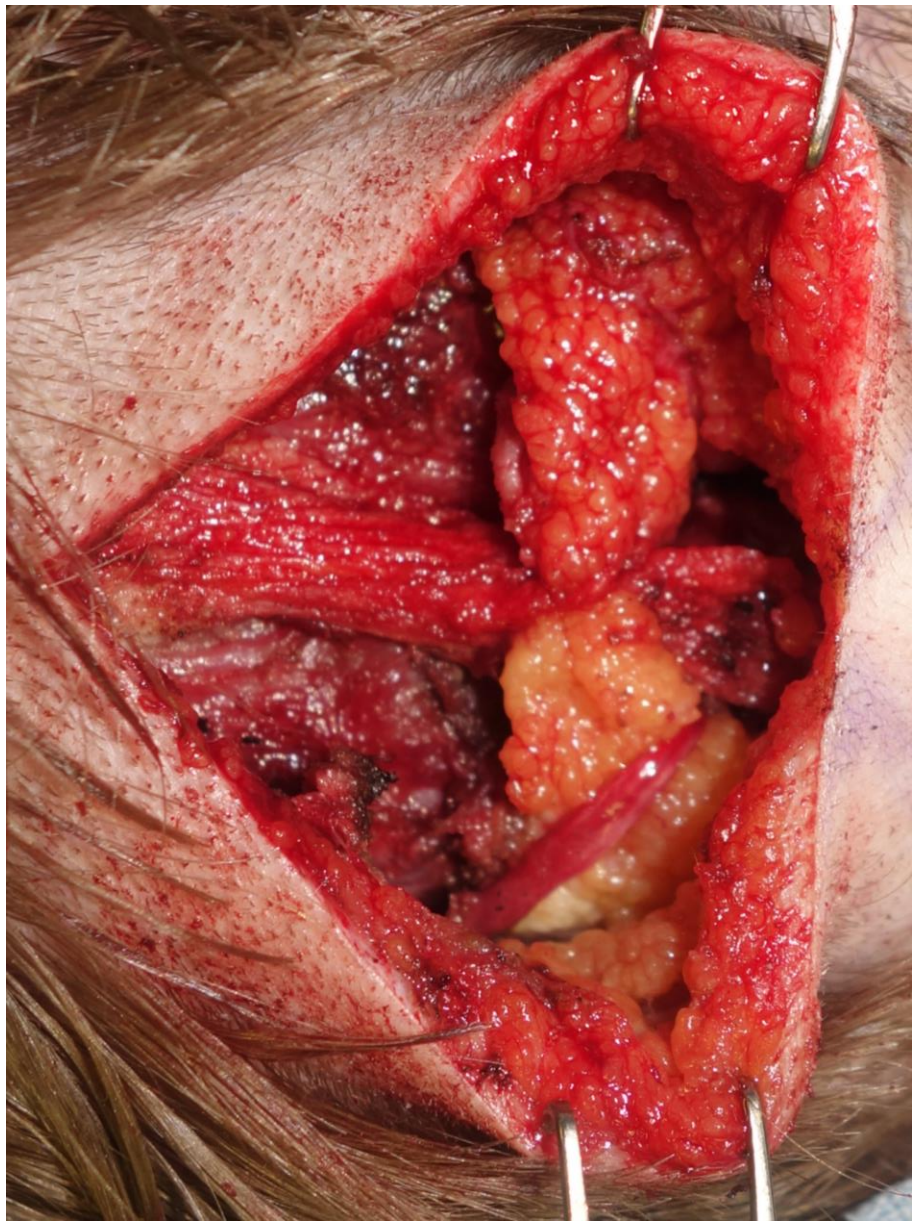

Supplement: gox-7-e2291-s007.pdf [file gox-7-e2291-s007.pdf]

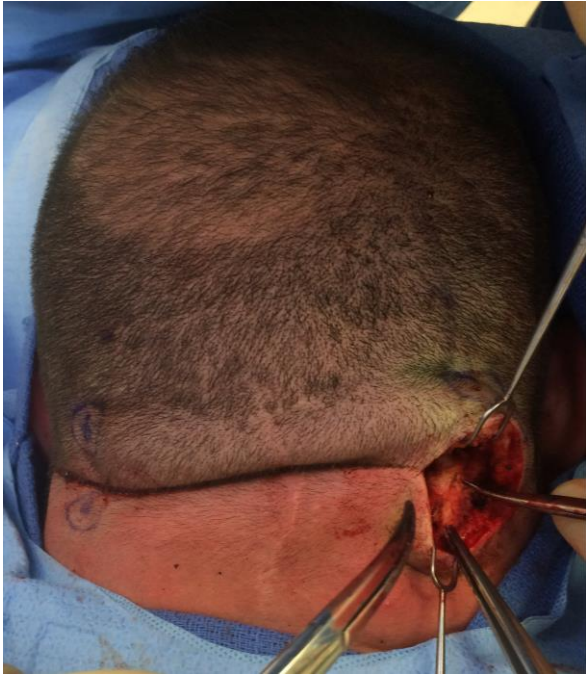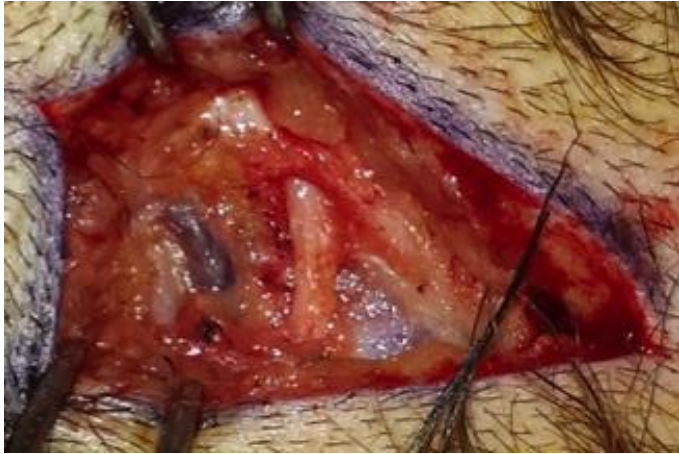

Supplement: gox-7-e2291-s009.pdf [file gox-7-e2291-s009.pdf]

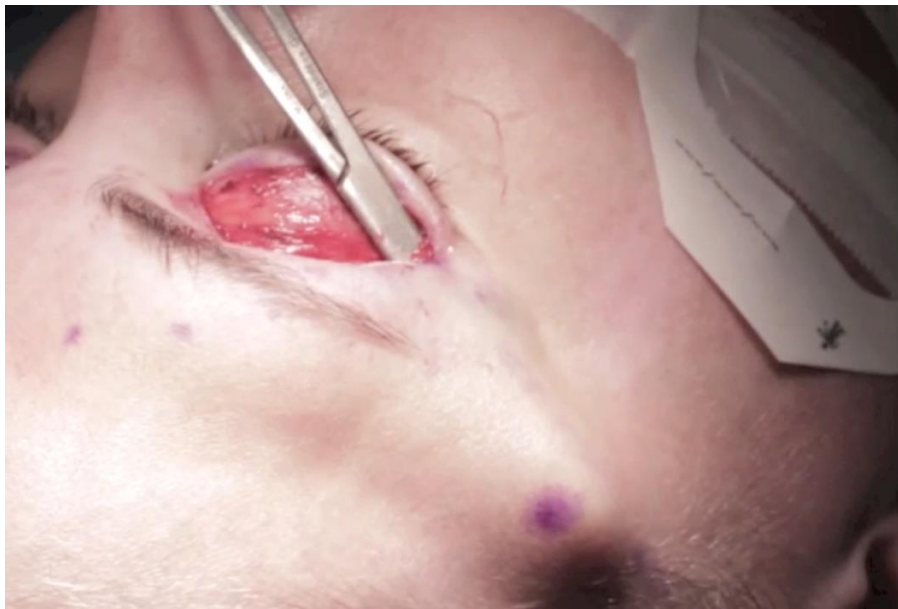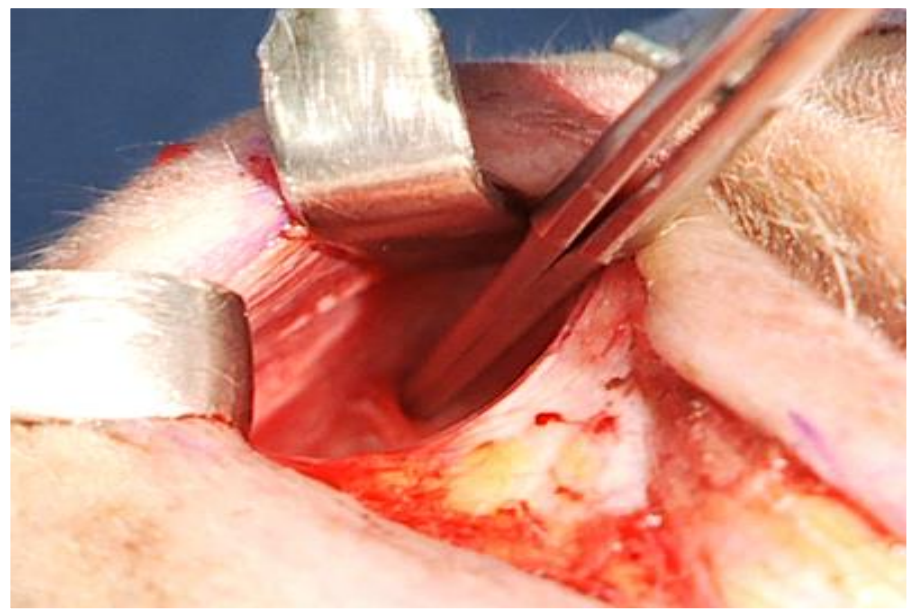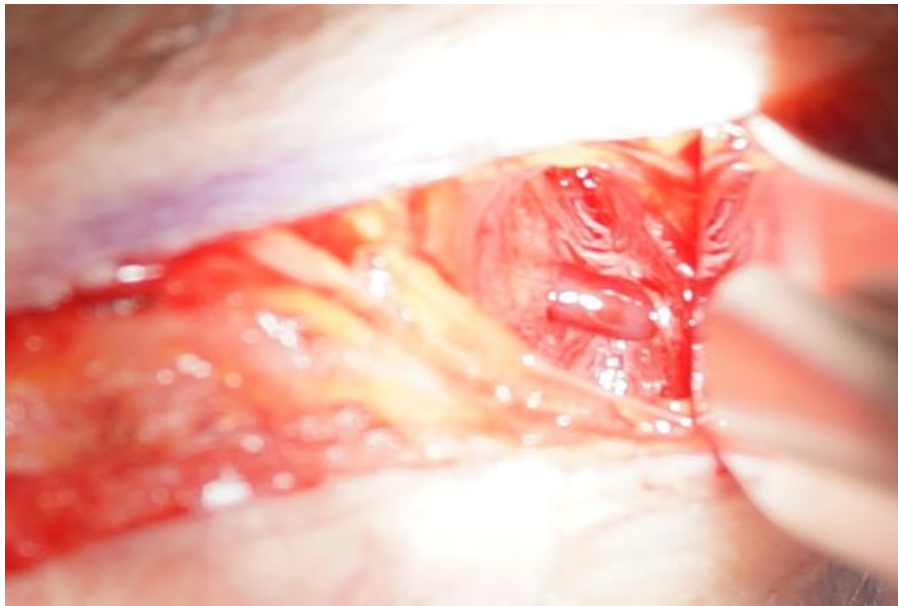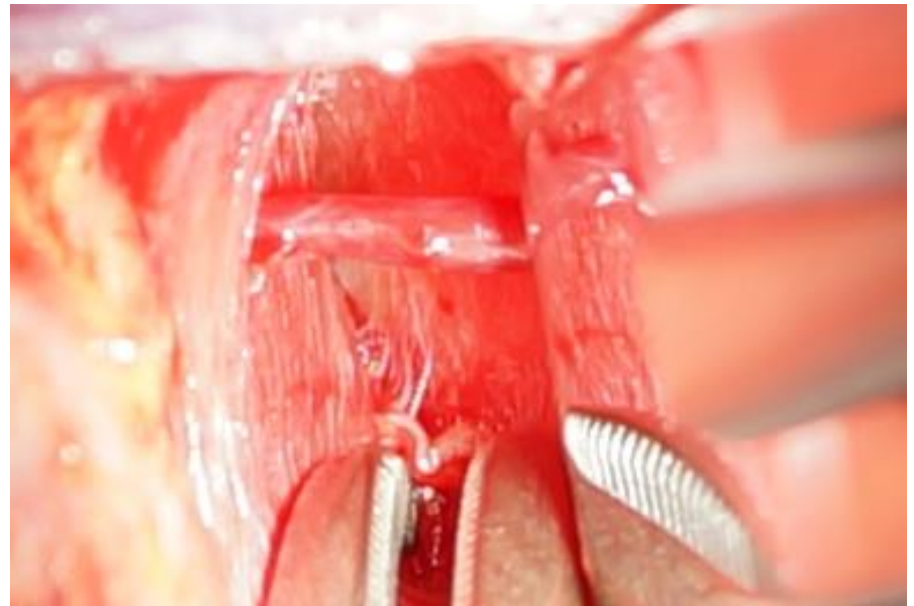

Supplement: gox-7-e2291-s011.pdf [file gox-7-e2291-s011.pdf]

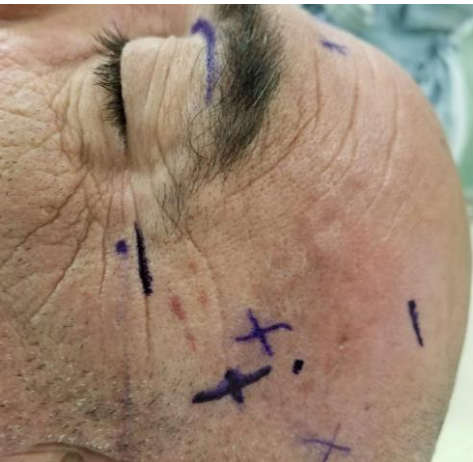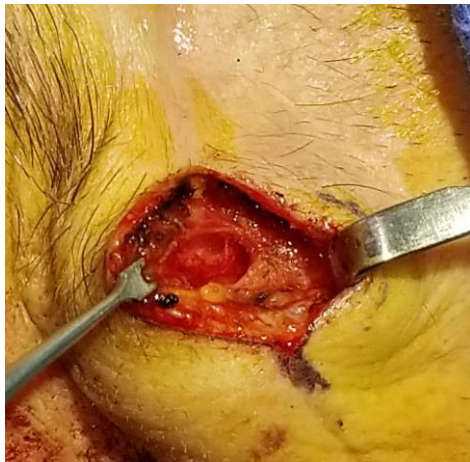

Supplement: gox-7-e2291-s013.pdf [file gox-7-e2291-s013.pdf]

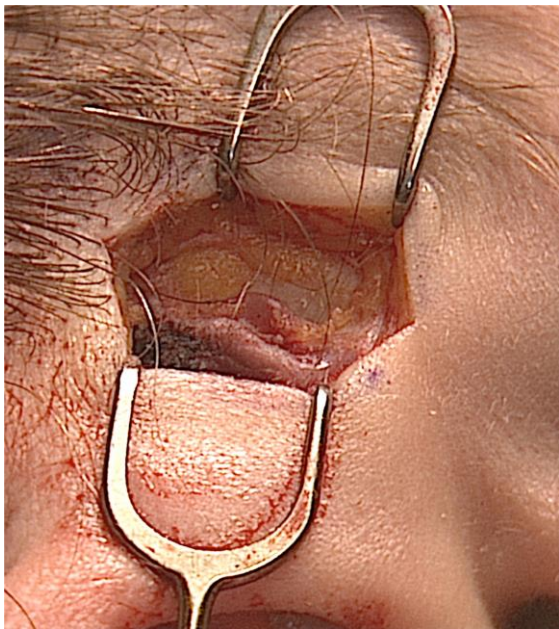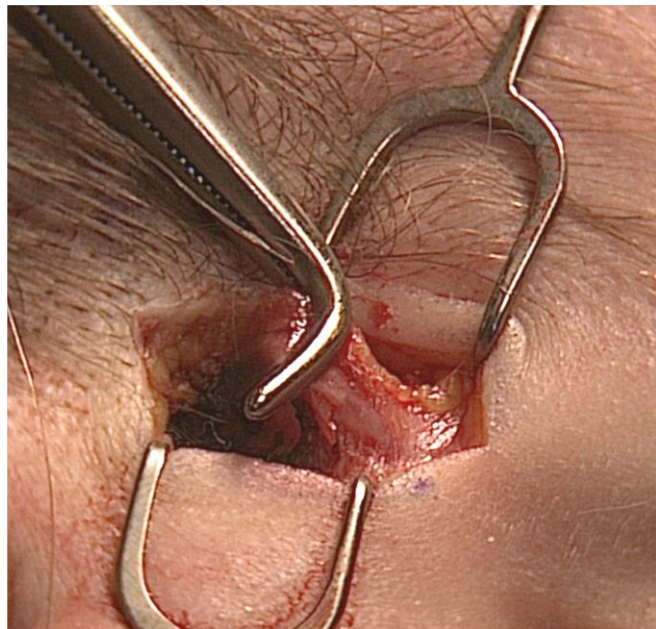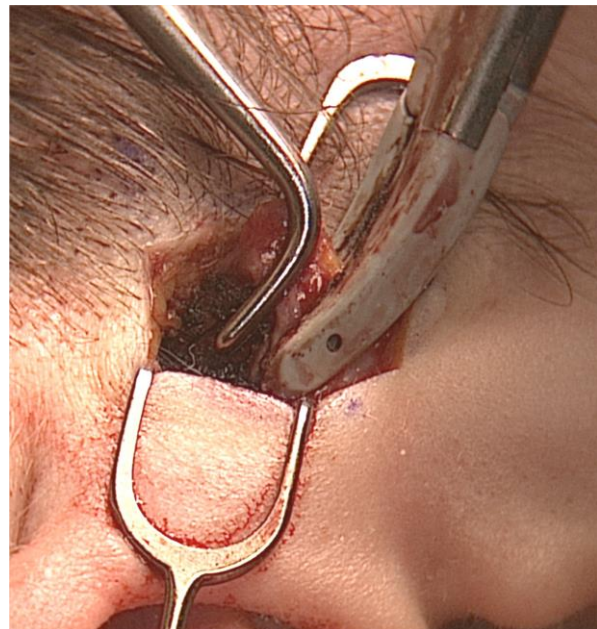

Supplement: gox-7-e2291-s014.pdf [file gox-7-e2291-s014.pdf]
